# Supplementary material for: Snow water equivalent change mapping from slope-correlated synthetic aperture radar interferometry (InSAR) phase variations
Source: Copernicus journal article supplement (doi:10.5194/tc-16-1497-2022), 2022-04-27
Supplement: Supplementary file 1 [file tc-16-1497-2022-supplement.pdf]

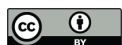

*Supplement of*

## **Snow water equivalent change mapping from slope-correlated synthetic aperture radar interferometry (InSAR) phase variations**

**Jayson Eppler et al.**

*Correspondence to:* Jayson Eppler ([jaysone@sfu.ca](mailto:jaysone@sfu.ca))

The copyright of individual parts of the supplement might differ from the article licence.

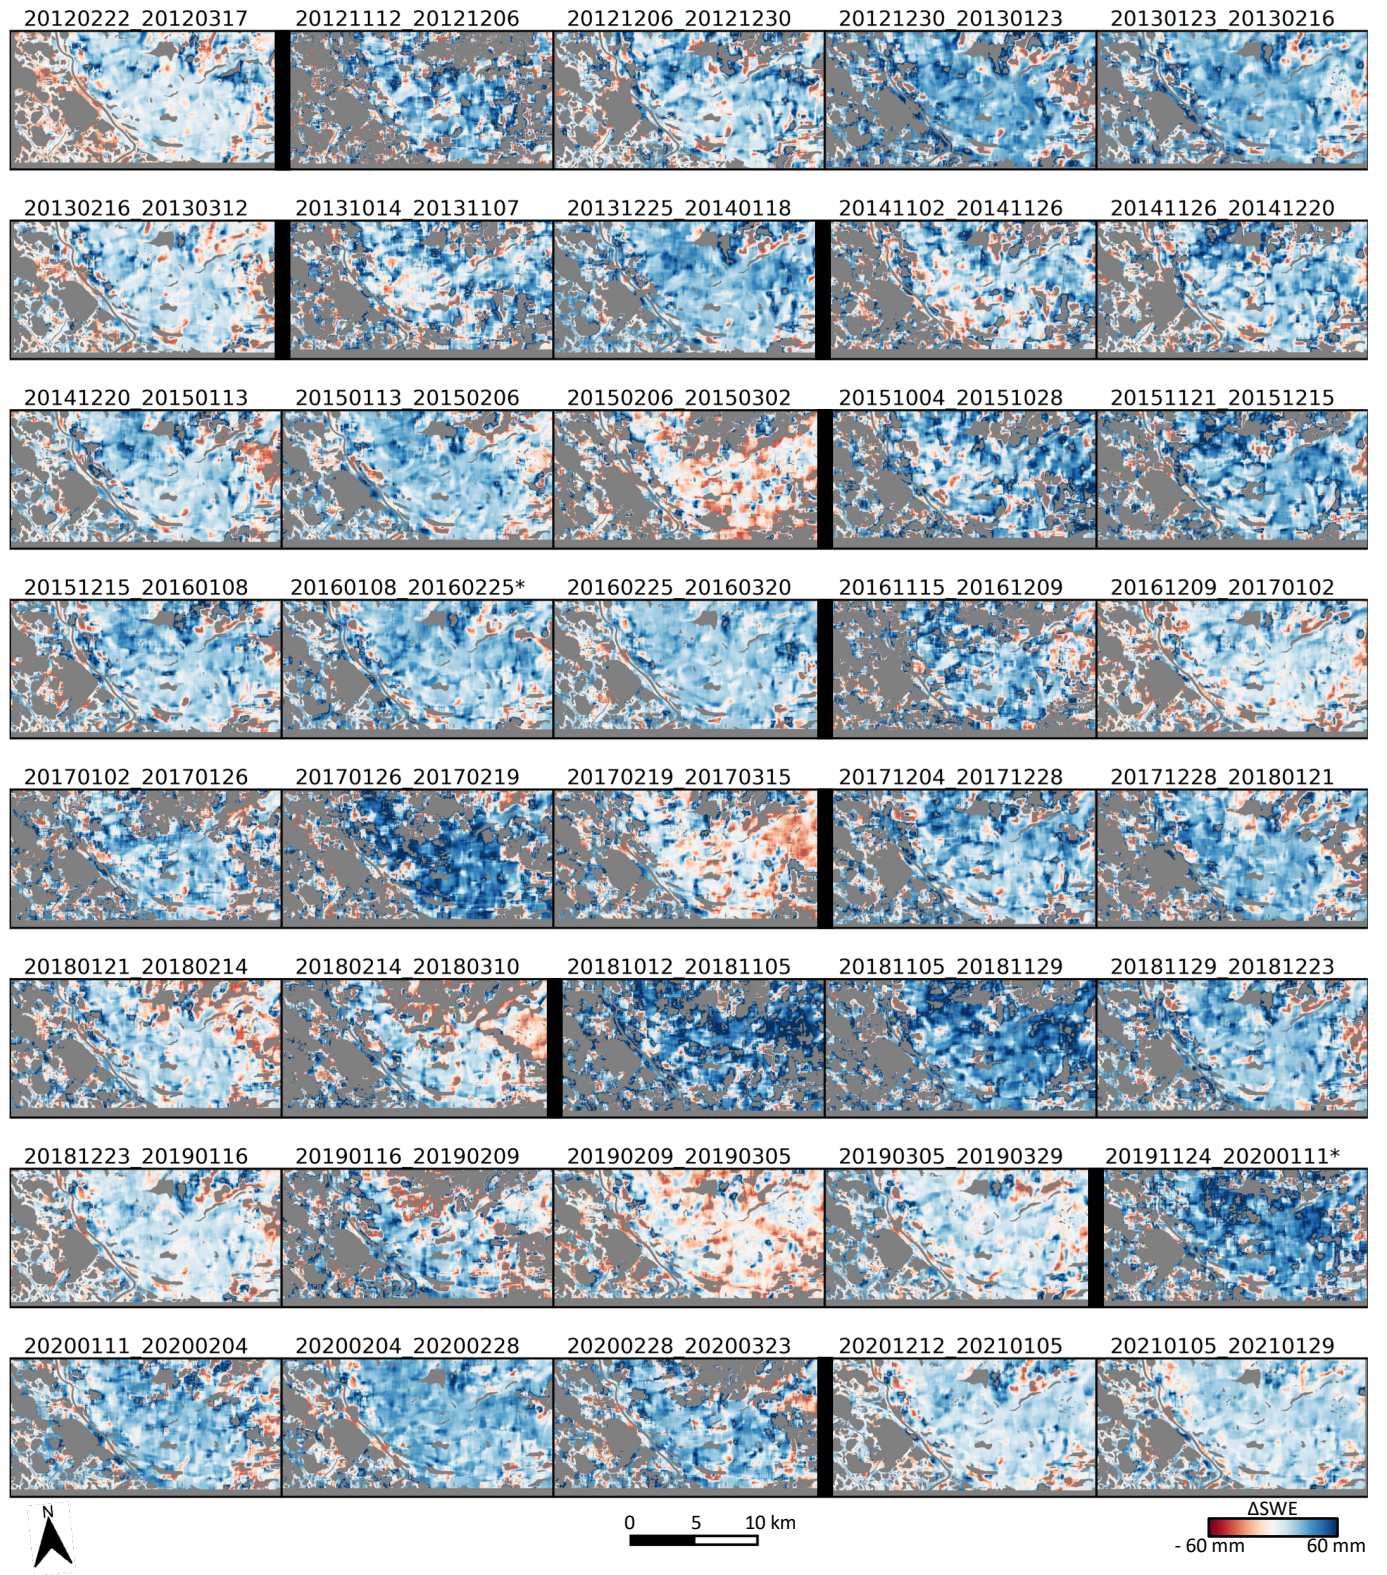

**Figure S1.** Dry-snow season  $\Delta$ SWE maps (both images in each pair acquired Oct 1 – Mar 31) estimated with the SlopeVar estimator. Water areas and points with no solution in the  $\Delta$ SWE search range are greyed out. Vertical black bars separate the dry-snow seasons. Maps span 24-days except for two that span 48-days (labeled with ‘\*’) due to images not acquired.
